# Supplementary material for: Inter-assay variation and reproducibility of progesterone measurements during ovarian stimulation for IVF
Source: PubMed Central journal article supplement (PMC6211677; doi:10.1371/journal.pone.0206098), 2018-11-01

REF

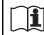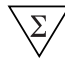

SYSTEM

07027699190

07027699500

300

cobas e 801

## English

### System Information

|            |                               |
|------------|-------------------------------|
| Short name | ACN (application code number) |
| PROG 3     | 10045                         |

### Intended use

Immunoassay for the in vitro quantitative determination of progesterone in human serum and plasma.

The electrochemiluminescence immunoassay "ECLIA" is intended for use on the **cobas e 801** immunoassay analyzer.

### Summary

The gestagen progesterone is a steroid hormone which is mainly formed in the cells of the corpus luteum and during pregnancy in the placenta.

The progesterone concentration correlates with the development and regression of the corpus luteum. Whereas progesterone is barely detectable in the follicular phase of the female cycle, a rise in the progesterone level is observed one day prior to ovulation. Increased progesterone synthesis occurs during the luteal phase. In the second half of the cycle pregnanediol is excreted in urine as the main degradation product of progesterone.<sup>1</sup>

Progesterone brings about the conversion of the uterine mucosa into a tissue rich in glands (secretion phase), in order to prepare for the intrauterine implantation of the fertilized ovum. During pregnancy, progesterone inhibits the contraction of the myometrium. In the mammary gland, progesterone (together with estrogens) promotes the proliferation, secretion and disposition of the alveoli.<sup>1,2,3,4</sup>

The determination of progesterone is utilized in fertility diagnosis for the detection of ovulation and assessment of the luteal phase.<sup>5</sup>

### Test principle

Competition principle. Total duration of assay: 18 minutes.

- 1st incubation: By incubating the sample (12 µL) with a progesterone-specific biotinylated antibody, immunocomplexes are formed, the amount of which is dependent upon the analyte concentration in the sample.
- 2nd incubation: After addition of streptavidin-coated microparticles and an progesterone derivative labeled with a ruthenium complex<sup>a)</sup>, the still-vacant sites of the biotinylated antibodies become occupied, with formation of an antibody-hapten complex. The entire complex becomes bound to the solid phase via interaction of biotin and streptavidin.
- The reaction mixture is aspirated into the measuring cell where the microparticles are magnetically captured onto the surface of the electrode. Unbound substances are then removed with ProCell II M. Application of a voltage to the electrode then induces chemiluminescent emission which is measured by a photomultiplier.
- Results are determined via a calibration curve which is instrument-specifically generated by 2-point calibration and a master curve provided via the **cobas** link.

a) Tris(2,2'-bipyridyl)ruthenium(II)-complex (Ru(bpy)<sub>3</sub><sup>2+</sup>)

### Reagents - working solutions

The **cobas e** pack is labeled as PROG 3.

- M Streptavidin-coated microparticles, 1 bottle, 12.4 mL:  
Streptavidin-coated microparticles 0.72 mg/mL; preservative.
- R1 Anti-progesterone-Ab-biotin, 1 bottle, 21.0 mL:  
Biotinylated monoclonal anti-progesterone antibody (recombinant, sheep) 30 ng/mL, phosphate buffer 25 mmol/L, pH 7.0; preservative.
- R2 Progesterone-peptide~Ru(bpy)<sub>3</sub><sup>2+</sup>, 1 bottle, 18.8 mL:  
Progesterone (of vegetable origin) coupled to a synthetic peptide labeled with ruthenium complex, 2 ng/mL; phosphate buffer 25 mmol/L, pH 7.0; preservative.

### Precautions and warnings

For in vitro diagnostic use.

Exercise the normal precautions required for handling all laboratory reagents.

Disposal of all waste material should be in accordance with local guidelines. Safety data sheet available for professional user on request.

Avoid foam formation in all reagents and sample types (specimens, calibrators and controls).

### Reagent handling

The reagents in the kit have been assembled into a ready-for-use unit that cannot be separated.

All information required for correct operation is available via the **cobas** link.

### Storage and stability

Store at 2-8 °C.

Do not freeze.

Store the **cobas e** pack **upright** in order to ensure complete availability of the microparticles during automatic mixing prior to use.

|                                    |                                  |
|------------------------------------|----------------------------------|
| Stability:                         |                                  |
| unopened at 2-8 °C                 | up to the stated expiration date |
| on the <b>cobas e 801</b> analyzer | 16 weeks                         |

### Specimen collection and preparation

Only the specimens listed below were tested and found acceptable.

Serum collected using standard sampling tubes or tubes containing separating gel.

Li-heparin, K<sub>2</sub>-EDTA and K<sub>3</sub>-EDTA plasma.

Criterion: Slope 0.9-1.1 + intercept within  $\pm 0.1$  ng/mL + coefficient of correlation  $\geq 0.95$ .

Stable for 1 day at 20-25 °C, 5 days at 2-8 °C, 6 months at -20 °C ( $\pm 5$  °C). Freeze only once.

The sample types listed were tested with a selection of sample collection tubes that were commercially available at the time of testing, i.e. not all available tubes of all manufacturers were tested. Sample collection systems from various manufacturers may contain differing materials which could affect the test results in some cases. When processing samples in primary tubes (sample collection systems), follow the instructions of the tube manufacturer.

Centrifuge samples containing precipitates before performing the assay.

Do not use heat-inactivated samples.

Do not use samples and controls stabilized with azide.

Ensure the samples and calibrators are at 20-25 °C prior to measurement.

Due to possible evaporation effects, samples and calibrators on the analyzers should be analyzed/measured within 2 hours.

### Materials provided

See "Reagents – working solutions" section for reagents.

### Materials required (but not provided)

- [REF] 07092547190, Progesterone III CalSet, for 4 x 1.0 mL
  - [REF] 11731416190, PreciControl Universal, for 4 x 3 mL
  - [REF] 03028542122, Diluent Estradiol/Progesterone, 2 x 22 mL sample diluent
  - General laboratory equipment
  - cobas e 801** analyzer
- Accessories for the **cobas e 801** analyzer:
- [REF] 06908799190, ProCell II M, 2 x 2 L system solution
  - [REF] 04880293190, CleanCell M, 2 x 2 L measuring cell cleaning solution
  - [REF] 07485409001, Reservoir Cups, 8 cups to supply ProCell II M and CleanCell M



# Elecsys Progesterone III

Depending on the biological variance of the diluted patient sample and the human serum matrix used for production of Diluent Estradiol/Progesterone, lower recovery of diluted samples may be observed.

## Expected values

The expected ranges were determined by testing specimens drawn from 147 apparently healthy males, 142 apparently healthy, post-menopausal women over the age of 50, and from 416 apparently healthy pregnant women between the ages of 17 and 45 (137 in the first trimester, 140 in the second trimester, and 139 in the third trimester). The expected range for healthy women was determined by weekly blood drawing over a period of 3 months from 26 apparently healthy women between the ages of 18 and 45 that were not taking any hormonal contraceptives. Based on a central 90 % interval, the following ranges were obtained:

| Test subjects             | N   | 5 <sup>th</sup> percentile<br>nmol/L | Median<br>nmol/L | 95 <sup>th</sup> percentile<br>nmol/L |
|---------------------------|-----|--------------------------------------|------------------|---------------------------------------|
| Healthy men               | 147 | < 0.159                              | < 0.159          | 0.474                                 |
| Healthy women             |     |                                      |                  |                                       |
| Follicular phase          | 117 | 0.181                                | 0.588            | 2.84                                  |
| Ovulation phase           | 38  | 0.385                                | 1.60             | 38.1                                  |
| Luteal phase              | 126 | 5.82                                 | 31.9             | 75.9                                  |
| Postmenopause             | 142 | < 0.159                              | < 0.159          | 0.401                                 |
| Healthy pregnant women    |     |                                      |                  |                                       |
| 1 <sup>st</sup> trimester | 137 | 35.0                                 | 76.3             | 141                                   |
| 2 <sup>nd</sup> trimester | 140 | 80.8                                 | 151              | 264                                   |
| 3 <sup>rd</sup> trimester | 139 | 187                                  | 340              | 681                                   |

| Test subjects             | N   | 5 <sup>th</sup> percentile<br>ng/mL | Median<br>ng/mL | 95 <sup>th</sup> percentile<br>ng/mL |
|---------------------------|-----|-------------------------------------|-----------------|--------------------------------------|
| Healthy men               | 147 | < 0.05                              | < 0.05          | 0.149                                |
| Healthy women             |     |                                     |                 |                                      |
| Follicular phase          | 117 | 0.057                               | 0.185           | 0.893                                |
| Ovulation phase           | 38  | 0.121                               | 0.503           | 12.0                                 |
| Luteal phase              | 126 | 1.83                                | 10.0            | 23.9                                 |
| Postmenopause             | 142 | < 0.05                              | < 0.05          | 0.126                                |
| Healthy pregnant women    |     |                                     |                 |                                      |
| 1 <sup>st</sup> trimester | 137 | 11.0                                | 24.0            | 44.3                                 |
| 2 <sup>nd</sup> trimester | 140 | 25.4                                | 47.5            | 83.3                                 |
| 3 <sup>rd</sup> trimester | 139 | 58.7                                | 107             | 214                                  |

Each laboratory should investigate the transferability of the expected values to its own patient population and if necessary determine its own reference ranges.

## Specific performance data

Representative performance data on the analyzer is given below. Results obtained in individual laboratories may differ.

## Precision

Precision was determined using Elecsys reagents, pooled human sera and controls in a protocol (EP05-A3) of the CLSI (Clinical and Laboratory Standards Institute): 2 runs per day in duplicate each for 21 days (n = 84). The following results were obtained:

| cobas e 801 analyzer |               |       |        |       |      |
|----------------------|---------------|-------|--------|-------|------|
| Sample               | Repeatability |       |        |       |      |
|                      | Mean          |       | SD     |       | CV   |
|                      | nmol/L        | ng/mL | nmol/L | ng/mL | %    |
| Human serum 1        | 0.172         | 0.054 | 0.035  | 0.011 | 20.7 |
| Human serum 2        | 2.10          | 0.659 | 0.089  | 0.028 | 4.2  |
| Human serum 3        | 9.64          | 3.03  | 0.264  | 0.083 | 2.7  |

| cobas e 801 analyzer           |               |       |        |       |     |
|--------------------------------|---------------|-------|--------|-------|-----|
| Sample                         | Repeatability |       |        |       |     |
|                                | Mean          |       | SD     |       | CV  |
|                                | nmol/L        | ng/mL | nmol/L | ng/mL | %   |
| Human serum 4                  | 70.0          | 22.0  | 0.789  | 0.248 | 1.1 |
| Human serum 5                  | 170           | 53.5  | 1.84   | 0.579 | 1.1 |
| PreciControl U <sup>b)</sup> 1 | 23.9          | 7.52  | 0.480  | 0.151 | 2.0 |
| PreciControl U2                | 49.6          | 15.6  | 0.712  | 0.224 | 1.4 |

b) U = Universal

| cobas e 801 analyzer |                        |       |        |       |      |
|----------------------|------------------------|-------|--------|-------|------|
| Sample               | Intermediate precision |       |        |       |      |
|                      | Mean                   |       | SD     |       | CV   |
|                      | nmol/L                 | ng/mL | nmol/L | ng/mL | %    |
| Human serum 1        | 0.172                  | 0.054 | 0.076  | 0.024 | 43.9 |
| Human serum 2        | 2.10                   | 0.659 | 0.130  | 0.041 | 6.2  |
| Human serum 3        | 9.64                   | 3.03  | 0.321  | 0.101 | 3.3  |
| Human serum 4        | 70.0                   | 22.0  | 1.18   | 0.372 | 1.7  |
| Human serum 5        | 170                    | 53.5  | 2.86   | 0.898 | 1.7  |
| PreciControl U1      | 23.9                   | 7.52  | 0.677  | 0.213 | 2.8  |
| PreciControl U2      | 49.6                   | 15.6  | 0.989  | 0.311 | 2.0  |

## Method comparison

A comparison of the Elecsys Progesterone III assay, [REF] 07027699190 (cobas e 801 analyzer; y) with the Elecsys Progesterone III assay, [REF] 07092539190 (cobas e 601 analyzer; x) gave the following correlations (ng/mL):

Number of samples measured: 153

|                             |                      |
|-----------------------------|----------------------|
| Passing/Bablok <sup>7</sup> | Linear regression    |
| $y = 0.984x + 0.001$        | $y = 0.981x + 0.086$ |
| $r = 0.985$                 | $r = 0.999$          |

The sample concentrations were between 0.050 and 59.0 ng/mL.

## Analytical specificity

For the Elecsys Progesterone III assay, the following cross-reactivities were found at the respective additive concentration, tested with progesterone concentrations of approximately 0.3 ng/mL and 5 ng/mL:

| Substance            | Additive<br>concentration<br>ng/mL | Cross-reactivity<br>% |
|----------------------|------------------------------------|-----------------------|
| Androstenediol       | 4000                               | 0.001                 |
| Androstenedione      | 80                                 | 0.107                 |
| Aldosterone          | 1000                               | 0.003                 |
| Allopregnanolone     | 2000                               | 0.347                 |
| Corticosterone       | 200                                | 0.921                 |
| Cortisol             | 20000                              | 0.006                 |
| Danazol              | 100000                             | 0.001                 |
| DHEA-S               | 16000                              | n. d. <sup>c)</sup>   |
| Norgestrel           | 1000                               | 0.011                 |
| Estradiol            | 400                                | n. d.                 |
| Ethisterone          | 1000                               | 0.001                 |
| Ethinodiol diacetate | 1000                               | n. d.                 |
| Medroxyprogesterone  | 5000                               | 0.004                 |
| Norethindrone        | 1000                               | 0.004                 |

# Elecsys Progesterone III

| Substance                            | Additive concentration<br>ng/mL | Cross-reactivity<br>% |
|--------------------------------------|---------------------------------|-----------------------|
| Norethindrone acetate                | 1000                            | 0.008                 |
| Testosterone                         | 2000                            | 0.069                 |
| 21-Deoxycortisol                     | 2000                            | 0.067                 |
| 11-Deoxycorticosterone               | 600                             | 3.92                  |
| 11-Deoxycortisol                     | 6000                            | 0.015                 |
| 5- $\alpha$ -Dihydrotestosterone     | 20                              | n. d.                 |
| 5- $\beta$ -Dihydroprogesterone      | 240                             | 0.366                 |
| Pregnenolone                         | 16000                           | 0.410                 |
| Pregnanolone                         | 2000                            | 0.145                 |
| Medroxyprogesterone acetate          | 1000                            | 0.003                 |
| 6 $\alpha$ -Methylprednisolone       | 1000                            | 0.003                 |
| 17 $\alpha$ -Hydroxypregnenolone     | 2000                            | 0.009                 |
| 17 $\alpha$ -Hydroxyprogesterone     | 2000                            | 0.066                 |
| 20 $\alpha$ -Hydroxy-4-pregnen-3-one | 250                             | 0.086                 |

c) n. d. = not detectable

## References

- Johnson MR, Carter G, Grint C, et al. Relationship between ovarian steroids, gonadotrophins and relaxin during the menstrual cycle. *Acta Endocrinol* 1993;129:121-125.
- Laufer N, Navot D, Schenker JG. The pattern of luteal phase plasma progesterone and estradiol in fertile cycles. *Am J Obstet Gynecol* 1982;143:808-813.
- Veldhuis JD, Christiansen E, Evans WS, et al. Physiological profiles of episodic progesterone release during the midluteal phase of the human menstrual cycle: analysis of circadian and ultradian rhythms, discrete pulse properties, and correlations with simultaneous luteinizing hormone release. *J Clin Endocrinol Metab* 1988;66(2):414-421.
- Filicori M, Butler JP, Crowley WF Jr. Neuroendocrine regulation of the corpus luteum in the human. *J Clin Invest* 1984;73:1638-1647.
- Guillaume J, Benjamin F, Sicuranza B, et al. Maternal serum levels of estradiol, progesterone and h-Choriongonadotropin in ectopic pregnancy and their correlation with endometrial histologic findings. *Surg Gynecol Obstet* 1987;165:9-12.
- Thienpont L, Siekmann L, Lawson A, et al. Development, Validation and Certification by Isotope Dilution Gas Chromatography-Mass Spectrometry of Lyophilized Human Serum Reference Materials for Cortisol (CRM 192 and 193) and Progesterone (CRM 347 and 348). *Clin Chem* 1991;37(4):540-546.
- Bablok W, Passing H, Bender R, et al. A general regression procedure for method transformation. Application of linear regression procedures for method comparison studies in clinical chemistry, Part III. *J Clin Chem Clin Biochem* 1988 Nov;26(11):783-790.

For further information, please refer to the appropriate operator's manual for the analyzer concerned, the respective application sheets, the product information and the Method Sheets of all necessary components (if available in your country).

A point (period/stop) is always used in this Method Sheet as the decimal separator to mark the border between the integral and the fractional parts of a decimal numeral. Separators for thousands are not used.

## Symbols

Roche Diagnostics uses the following symbols and signs in addition to those listed in the ISO 15223-1 standard (for USA: see <https://usdiagnostics.roche.com> for definition of symbols used):

|  |                                                     |
|--|-----------------------------------------------------|
|  | Contents of kit                                     |
|  | Analyzers/Instruments on which reagents can be used |
|  | Reagent                                             |
|  | Calibrator                                          |

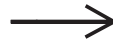

Volume after reconstitution or mixing

GTIN

Global Trade Item Number

COBAS, COBAS E, ELECSYS and PRECICONTROL are trademarks of Roche. INTRALIPID is a trademark of Fresenius Kabi AB.

All other product names and trademarks are the property of their respective owners.

Additions, deletions or changes are indicated by a change bar in the margin.

© 2017, Roche Diagnostics

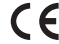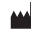

Roche Diagnostics GmbH, Sandhofer Strasse 116, D-68305 Mannheim  
[www.roche.com](http://www.roche.com)

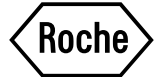

Supplement: pone.0206098.s003.pdf [file pone.0206098.s003.pdf]
